# Supplementary material for: Expanded eligibility for HIV testing increases HIV diagnoses—A cross-sectional study in seven health facilities in western Kenya
Source: PLoS One. 2019 Dec 27;14(12):e0225877. doi: 10.1371/journal.pone.0225877 (PMC6934319; doi:10.1371/journal.pone.0225877)
Supplement: S2 Excel — (CSV) [file pone.0225877.s002.csv]

Variable name	Variable Label	Value Labels
Database_ID	Unique database ID
Gender	Sex	1=Male; 2=Female
Age	Age in years
Age_category	Age category in years	1= 15-19; 2= 20-24; 3= 25-49; 4= >49
Patient_type	Patient type	1=Patient; 2=Non-patient
Screened	Screened for HIV test eligibility	1= Yes
Eligible	Eligible for HIV test	1= Yes; 2=No
Ineligible	Reason ineligible for HIV test	1 = Verified HIV-negative test <3 months ago; 2 = Known HIV positive
Tested	Tested for HIV	1= Yes; 2=No
HIV_test_result	HIV test result	0 = Positive; 1 = Negative
Met routine criteria	Met routine (MOH) HIV testing criteria	1= Yes; 0=No
Met_routine_criteriatsd	Met routine (MOH) HIV testing criteria and tested for HIV	1= Yes; 2=No
Reason_met_routine_criteria	Reason met routine (MOH) HIV testing criteria	1= Never tested; 2 = HIV-negative test >=12 months ago; 3= HIV-negative test date unknown; 4=Signs/symptoms of tuberculosis/sexually transmitted infection/HIV exposure
Met_RRI_criteria	Met criteria for reduced interval for retesting (RRI)	1= Yes; 0=No
Met_RRI_criteriatsd	Met criteria for reduced interval for retesting (RRI) and tested for HIV	1= Yes; 2=No
Reason_met_RRI_criteria	Reason met reduced interval for retesting (RRI) HIV testing criteria	1= HIV-negative test <3 months ago; 2= HIV-negative test 3-12 months ago
